# Supplementary material for: Polyphenol extract and essential oil of Amomum tsao-ko equally alleviate hypercholesterolemia and modulate gut microbiota
Source: Royal Society of Chemistry journal article supplement (doi:10.1039/d1fo03082e), 2021-01-01
Supplement: d1fo03082e1.pdf [file d1fo03082e1.pdf]

**Table S1** Compositions of Four Diets.

|                             | PCD | HCD | TKP  | TKO |
|-----------------------------|-----|-----|------|-----|
| Corn starch (g)             | 508 | 508 | 508  | 508 |
| Casein                      | 242 | 242 | 242  | 242 |
| Sucrose                     | 119 | 119 | 119  | 119 |
| Lard                        | 50  | 50  | 50   | 50  |
| Mineral mixture             | 40  | 40  | 40   | 40  |
| Vitamin mixture             | 20  | 20  | 20   | 20  |
| Gelatin                     | 20  | 20  | 20   | 20  |
| DL-methionine               | 1   | 1   | 1    | 1   |
| Cholestyramine              | 5   | 0   | 0    | 0   |
| Cholesterol                 | 0   | 1   | 1    | 1   |
| TKP (mg/day/kg body weight) | 0   | 0   | 1000 | 0   |
| TKO (mg/day/kg body weight) | 0   | 0   | 0    | 200 |

HCD, a high cholesterol diet containing 0.1% cholesterol; PCD, a HCD with 0.5% cholestyramine; TKP, a HCD with daily oral administration of *tsao-ko* polyphenol extract (1000 mg/day/kg body weight) ; TKO, a HCD with daily oral administration of *tsao-ko* essential oil (200 mg/day/kg body weight)

**Table S2** Quantitative Real-time PCR Primers Used to Measure Hamster RNA Levels

| Gene         | Forward primer 5' to 3'     | Reverse primer 5' to 3'   |
|--------------|-----------------------------|---------------------------|
| Liver        |                             |                           |
| SREBP2       | GGACTTGGTCATGGGAACAGATG     | TGTAATCAATGGCCTTCCTCAGAAC |
| LXR $\alpha$ | AAGCCCTGCATGCCTACGT         | TGCAGACGCAGTGCAAACA       |
| HMG-CoA-R    | CGAAGGGTTTGCAGTGATAAAGGA    | GCCATAGTCACATGAAGCTTCTGTA |
| LDL-R        | GCCGGGACTGGTCAGATG          | ACAGCCACCATTGTTGTCCA      |
| CYP7A1       | GGTAGTGTGCTGTTGTATATGGGTTA  | ACAGCCCAGGTATGGAATCAAC    |
| GAPDH        | GAACATCATCCCTGCATCCA        | CCAGTGAGCTTCCCCTTCA       |
| Intestine    |                             |                           |
| NPC1L1       | CCTGACCTTTATAGAACTCACCACAGA | GGGCCAAAATGCTCGTCAT       |
| ACAT2        | CCGAGATGCTTCGATTTGGA        | GTGCGGTAGTAGTTGGAGAAGGA   |
| MTP          | GTCAGGAAGCTGTGTCAGAATG      | CTCCTTTTTCTCTGGCTTTTCA    |
| ABCG5        | TGATTGGCAGCTATAATTTTGGG     | GTTGGGCTGCGATGGAAA        |
| ABCG8        | TGCTGGCCATCATAGGGAG         | TCCTGATTTTCATCTTGCCACC    |
| Cyclophilin  | CAAATGCTGGACCAAACACA        | CAGTCTTGGCGGTGCAGAT       |

**Table S3** Taxonomic Information of 23 key OTUs

| OTU    | Phylum                    | Class                     | Order                     | Family                           | Genus                                             |
|--------|---------------------------|---------------------------|---------------------------|----------------------------------|---------------------------------------------------|
| OTU64  | p__Bacteroidetes          | c__Bacteroidia            | o__Bacteroidales          | f__Rikenellaceae                 | <i>g__Alistipes</i>                               |
| OTU192 | p__Firmicutes             | c__Erysipelotrichia       | o__Erysipelotrichales     | f__Erysipelotrichaceae           | <i>g__Allobaculum</i>                             |
| OTU459 | p__Firmicutes             | c__Clostridia             | o__Clostridiales          | f__Family_XIII                   | <i>g__Anaerovorax</i>                             |
| OTU408 | p__Bacteroidetes          | c__Bacteroidia            | o__Bacteroidales          | f__Bacteroidaceae                | <i>g__Bacteroides</i>                             |
| OTU76  | p__Firmicutes             | c__Clostridia             | o__Clostridiales          | f__Lachnospiraceae               | <i>g__Coprococcus_2</i>                           |
| OTU76  | p__Firmicutes             | c__Clostridia             | o__Clostridiales          | f__Defluviitaleaceae             | <i>g__Defluviitaleaceae_UCG-011</i>               |
| OTU56  | p__Proteobacteria         | c__Deltaproteobacteria    | o__Desulfovibrionales     | f__Desulfovibrionaceae           | <i>g__Desulfovibrio</i>                           |
| OTU282 | p__Firmicutes             | c__Bacilli                | o__Lactobacillales        | f__Carnobacteriaceae             | <i>g__Granulicatella</i>                          |
| OTU234 | p__Firmicutes             | c__Clostridia             | o__Clostridiales          | f__Lachnospiraceae               | <i>g__Lachnospiraceae_UCG-006</i>                 |
| OTU37  | p__Firmicutes             | c__Bacilli                | o__Lactobacillales        | f__Lactobacillaceae              | <i>g__Lactobacillus</i>                           |
| OTU44  | p__Firmicutes             | c__Bacilli                | o__Lactobacillales        | f__Streptococcaceae              | <i>g__Lactococcus</i>                             |
| OTU347 | p__Actinobacteria         | c__Actinobacteria         | o__Bifidobacteriales      | f__Bifidobacteriaceae            | <i>g__Metascardovia</i>                           |
| OTU256 | p__Bacteroidetes          | c__Bacteroidia            | o__Bacteroidales          | f__Prevotellaceae                | <i>g__Prevotellaceae_Ga6A1_group</i>              |
| OTU394 | p__Bacteroidetes          | c__Bacteroidia            | o__Bacteroidales          | f__Rikenellaceae                 | <i>g__Rikenellaceae_RC9_gut_group</i>             |
| OTU381 | p__Firmicutes             | c__Clostridia             | o__Clostridiales          | f__Ruminococcaceae               | <i>g__Ruminococcaceae_UCG-014</i>                 |
| OTU287 | p__Firmicutes             | c__Clostridia             | o__Clostridiales          | f__Ruminococcaceae               | <i>g__Ruminococcus_2</i>                          |
| OTU433 | p__Firmicutes             | c__Bacilli                | o__Lactobacillales        | f__Streptococcaceae              | <i>g__Streptococcus</i>                           |
| OTU474 | p__Firmicutes             | c__Clostridia             | o__Clostridiales          | f__Clostridiales_vadinBB60_group | <i>g__norank_f__Clostridiales_vadinBB60_group</i> |
| OTU153 | p__Firmicutes             | c__Clostridia             | o__Clostridiales          | f__Ruminococcaceae               | <i>g__norank_f__Ruminococcaceae</i>               |
| OTU291 | p__Firmicutes             | c__Clostridia             | o__Clostridiales          | f__Christensenellaceae           | <i>g__unclassified_f__Christensenellaceae</i>     |
| OTU144 | p__Actinobacteria         | c__Actinobacteria         | o__Coriobacteriales       | f__Coriobacteriaceae             | <i>g__unclassified_f__Coriobacteriaceae</i>       |
| OTU34  | p__Firmicutes             | c__Erysipelotrichia       | o__Erysipelotrichales     | f__Erysipelotrichaceae           | <i>g__unclassified_f__Erysipelotrichaceae</i>     |
| OTU332 | p__unclassified_k__norank | c__unclassified_k__norank | o__unclassified_k__norank | f__unclassified_k__norank        | <i>g__unclassified_k__norank</i>                  |

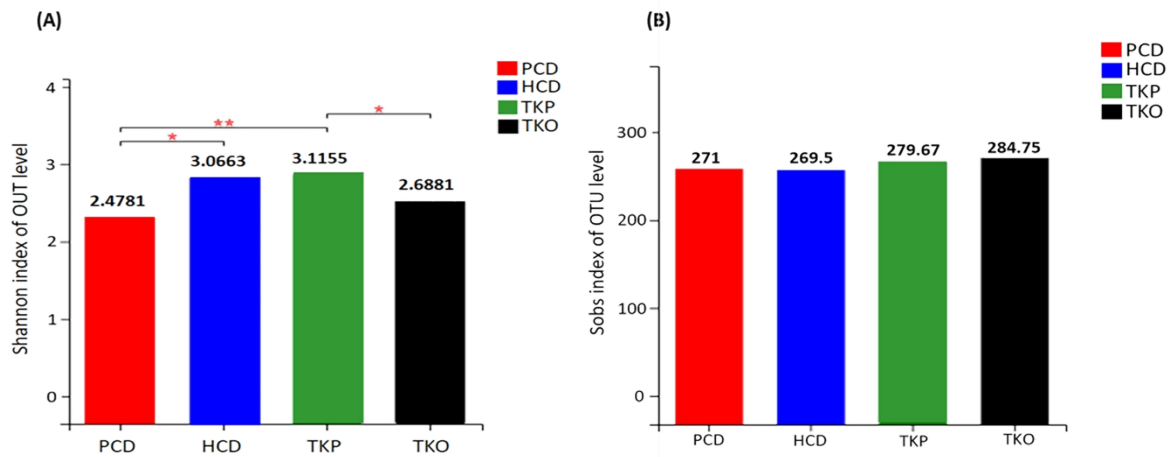

**Figure S1.** Alpha diversity of gut microbiota represented by (A) Shannon index and (B) Sobs index in hamsters fed one of the four diets. HCD, a 0.1% cholesterol diet; PCD, a HCD with 0.5% cholestyramine; TKP, a HCD with daily oral administration of *tsao-ko* polyphenol extract (1000 mg/kg body weight); TKO, a HCD with daily oral administration of *tsao-ko* essential oil (200 mg/kg body weight). Asterisks “\*” and “\*\*” indicate the significant difference at  $p < 0.05$  and  $p < 0.01$ , respectively.

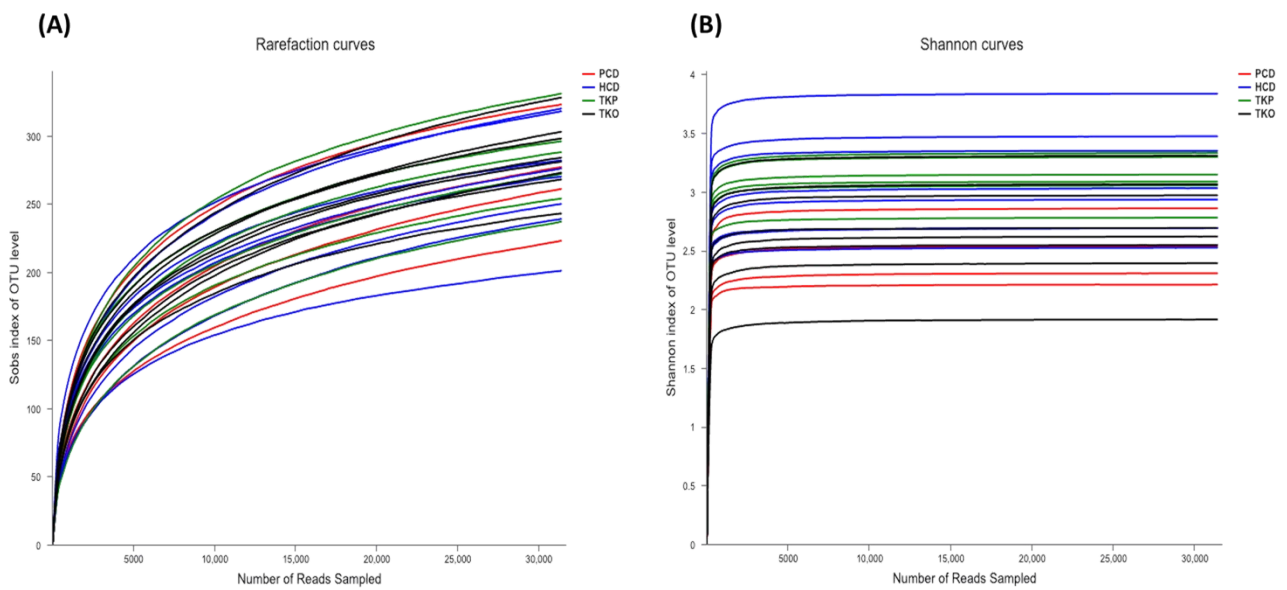

**Figure S2.** Rarefaction curves of (A) Sobs index and (B) Shannon index in hamsters fed one of the four diets. HCD, a 0.1% cholesterol diet; PCD, a HCD with 0.5% cholestyramine; TKP, a HCD with daily oral administration of *tsao-ko* polyphenol extract (1000 mg/kg body weight); TKO, a HCD with daily oral administration of *tsao-ko* essential oil (200 mg/kg body weight).

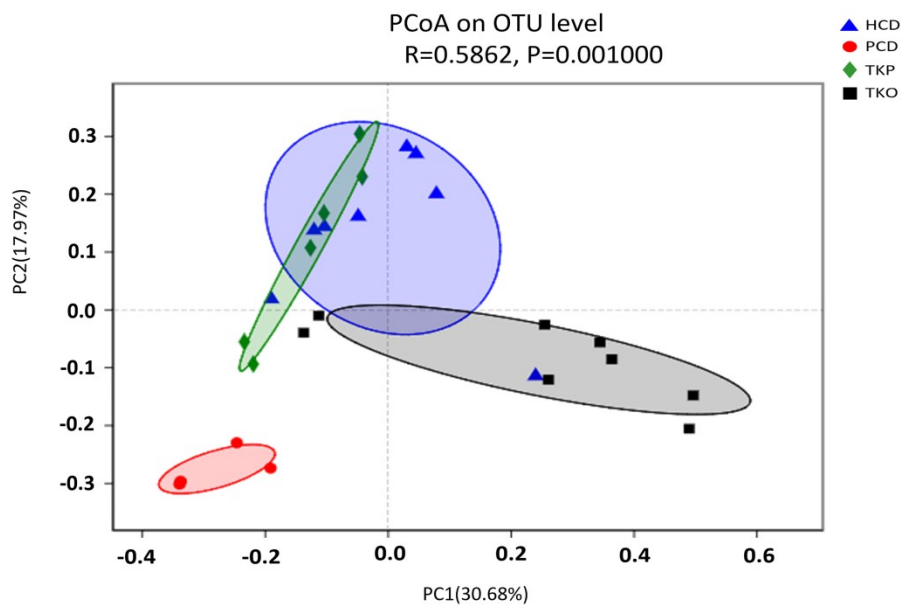

**Figure S3.** Beta diversity of the gut microbiota evaluated by unweighted UniFrac principle coordinate analysis (PCoA) plot based on OTUs abundance in hamsters fed one of the four diets. HCD, a 0.1% cholesterol diet; PCD, a HCD with 0.5% cholestyramine; TKP, a HCD with daily oral administration of *tsao-ko* polyphenol extract (1000 mg/kg body weight); TKO, a HCD with daily oral administration of *tsao-ko* essential oil (200 mg/kg body weight).

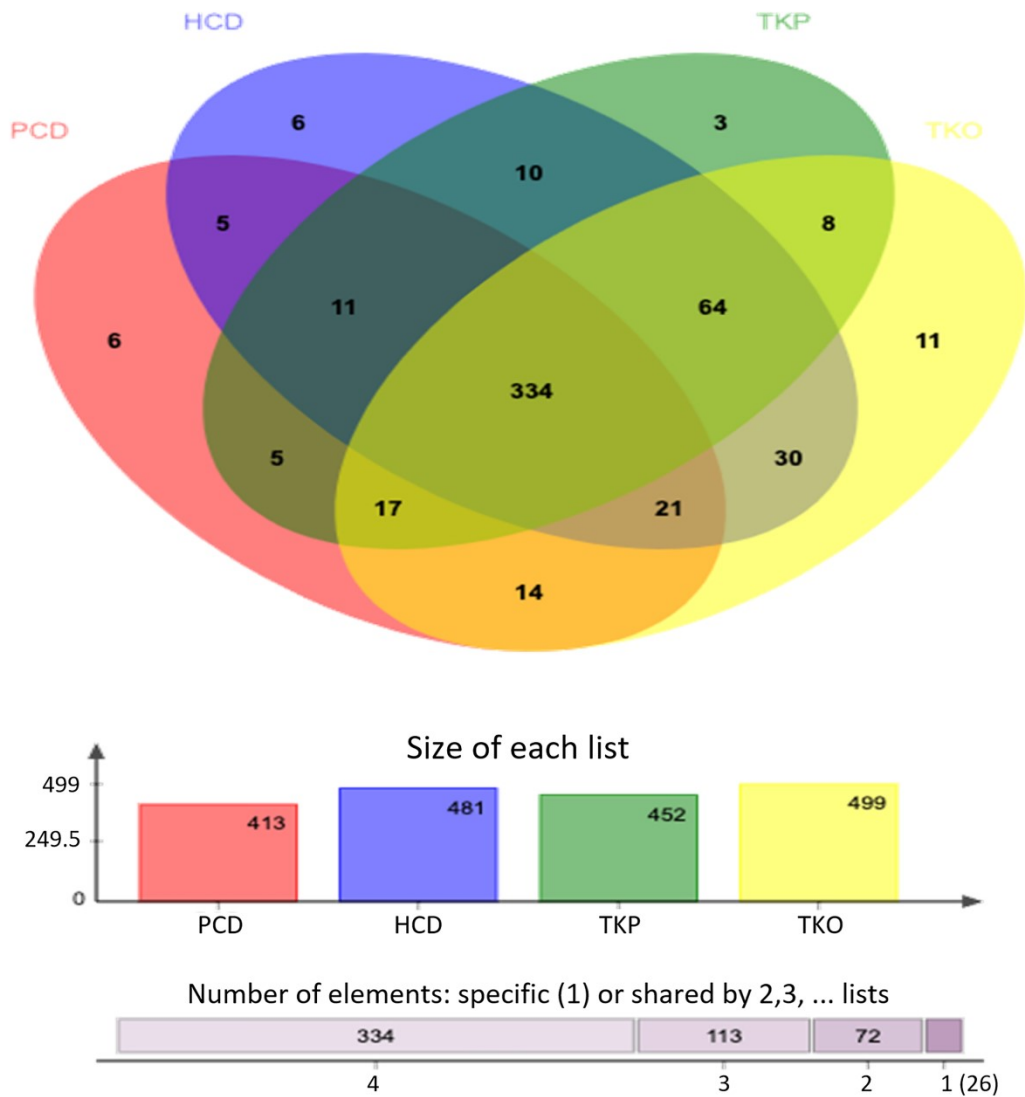

**Figure S4.** Venne diagram showing the unique and shared OTUs of gut microbiota in hamsters fed one of the four diets. HCD, a 0.1% cholesterol diet; PCD, a HCD with 0.5% cholestyramine; TKP, a HCD with daily oral administration of *tsao-ko* polyphenol extract (1000 mg/kg body weight); TKO, a HCD with daily oral administration of *tsao-ko* essential oil (200 mg/kg body weight).

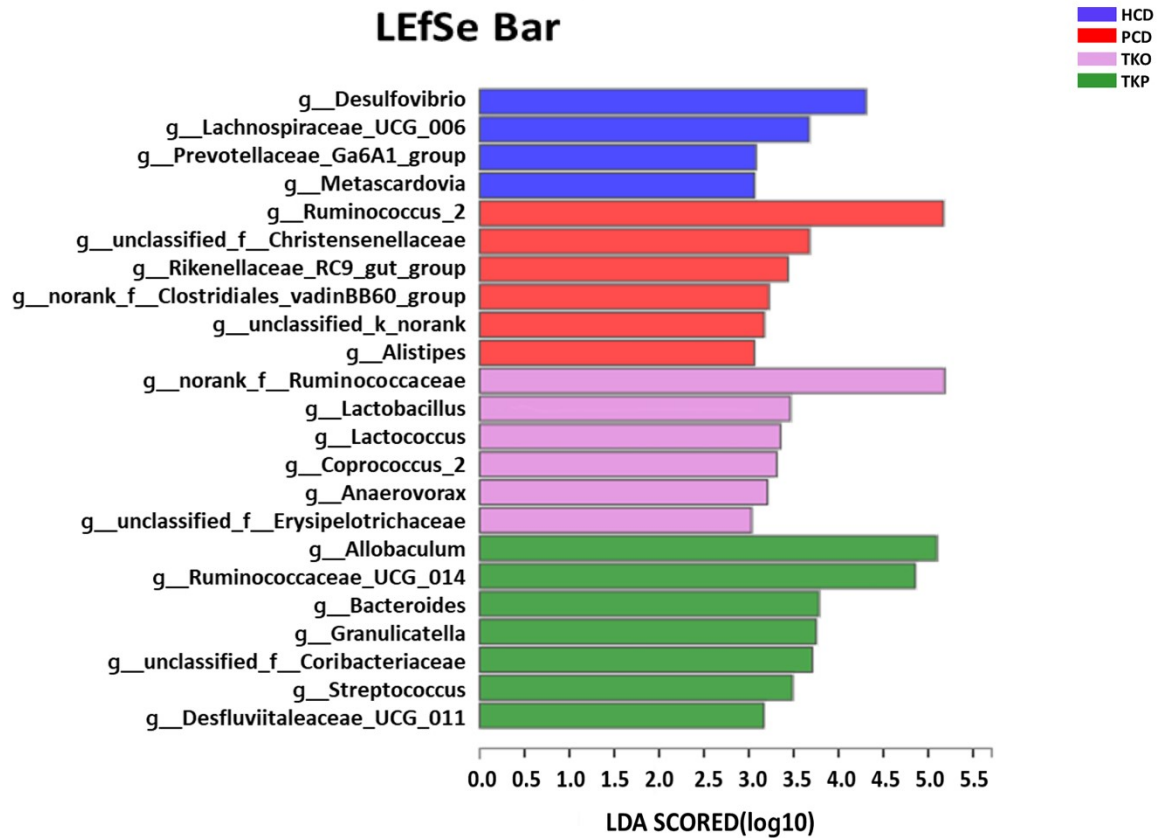

**Figure S5.** Linear discriminant analysis coupled with effect size (LEfSe) analysis in hamsters fed one of the four diets. HCD, a 0.1% cholesterol diet; PCD, a HCD with 0.5% cholestyramine; TKP, a HCD with daily oral administration of *tsao-ko* polyphenol extract (1000 mg/kg body weight); TKO, a HCD with daily oral administration of *tsao-ko* essential oil (200 mg/kg body weight).
